# Supplementary material for: Controllable generation of ZnO/ZnCo2O4 arising from bimetal–organic frameworks for electrochemical detection of naphthol isomers
Source: Royal Society of Chemistry journal article supplement (doi:10.1039/d1an00193k), 2021-01-01
Supplement: d1an00193k1.pdf [file d1an00193k1.pdf]

## Supporting Information

### **Controllable generation of ZnO/ZnCo<sub>2</sub>O<sub>4</sub> arising from bimetal-organic frameworks for electrochemical detection of naphthol isomers**

Lei Peng<sup>a, b</sup>, Sheying Dong<sup>a, \*</sup>, Yaqi An<sup>a</sup>, Mengnan Qu<sup>b, \*</sup>

*<sup>a</sup> School of Chemistry and Chemical Engineering, Xi'an University of Architecture and Technology, Xi'an 710055, People's Republic of China*

*<sup>b</sup> College of Chemistry and Chemical Engineering, Xi'an University of Science and Technology, Xi'an 710054, People's Republic of China*

\*Corresponding author. Phone: (+86)-29-82201203. Fax: (+86)-29-82205332.

E-mail address: dongsyy@126.com (S.Y. Dong)

## **Experimental section**

### **Electrochemical measurements**

All electrochemical measurements were carried out with a CHI660D electrochemical workstation (Shanghai Chenhua Co.). A three-electrode system was used, where a saturated calomel electrode (SCE) served as the reference electrode, a platinum wire electrode as the auxiliary electrode and a modified CPE as the working electrode. Cyclic voltammetric measurements were done in an undivided 30 mL electrochemical teflon cell at  $25 \pm 0.5$  °C. AC impedance experiments were carried out in 5.0 mM  $K_3Fe(CN)_6/K_4Fe(CN)_6$  (1:1) containing 0.1M KCl, while the applied perturbation amplitude was 0.005 V, the frequencies swept from  $10^5$  to  $10^{-2}$  Hz, the number of points per frequency decade was 12 and the initial potential was 0.20 V vs. RE (SCE).

### **Preparation of CPE electrodes**

0.6 g of liquid paraffin and 3.4 g of graphite powder were hand-mixed to produce a homogenous paste. Then the prepared carbon paste was firmly packed into a PVC tube (3 mm internal diameter) and a copper wire (1.5 mm external diameter) was introduced into the other end for electrical contact.

## Results and discussion

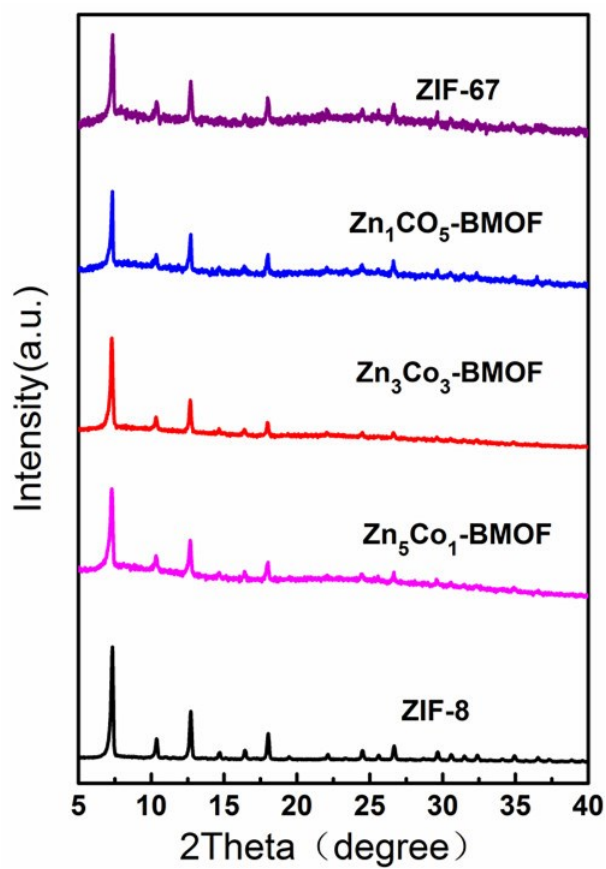

**Fig. S1** The XRD pattern of Zn<sub>6</sub>Co<sub>0</sub>-BMOF (ZIF-8), Zn<sub>5</sub>Co<sub>1</sub>-BMOF, Zn<sub>3</sub>Co<sub>3</sub>-BMOF, Zn<sub>1</sub>Co<sub>5</sub>-BMOF and Zn<sub>0</sub>Co<sub>6</sub>-BMOF (ZIF-67)

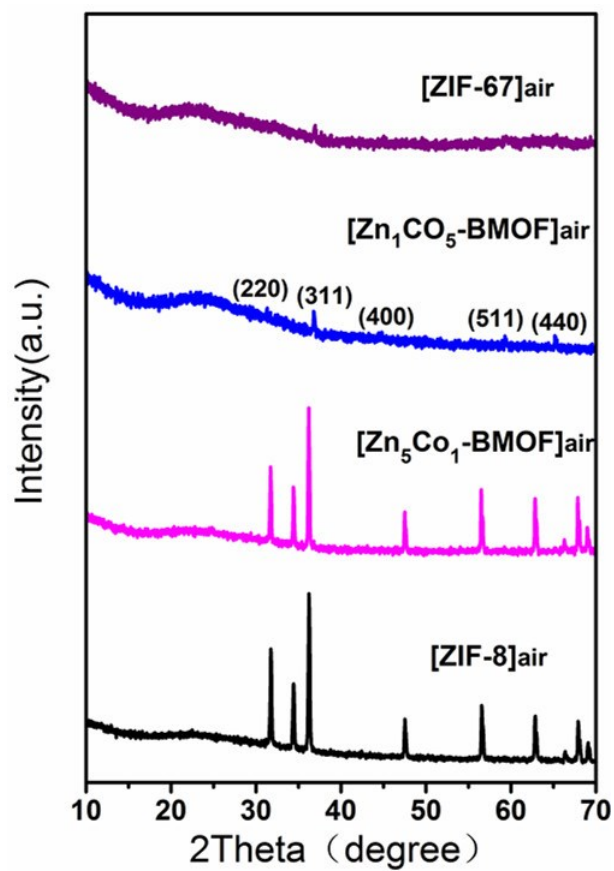

Fig. S2 The XRD pattern of  $[\text{Zn}_x\text{Co}_{6-x}\text{-BMOF}]_{\text{air}}$  ( $x=0, 1, 5, 6$ )

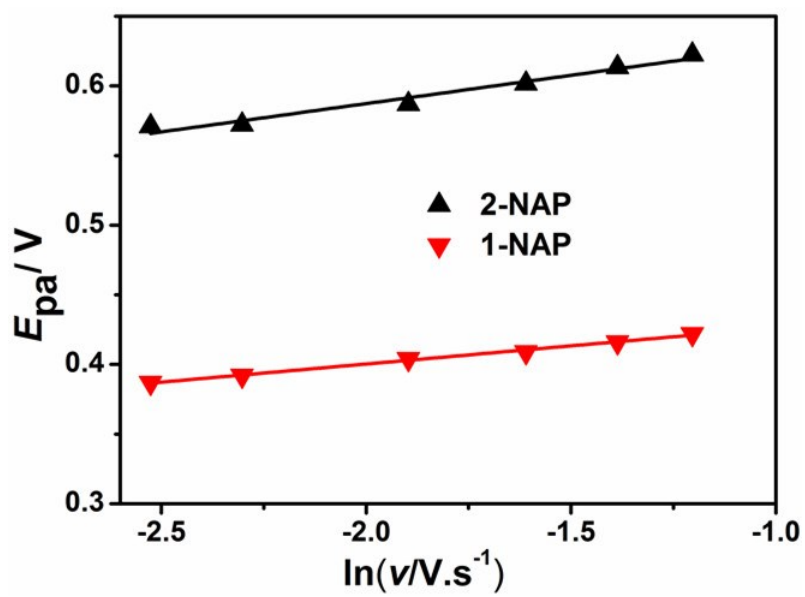

Fig. S3 The plots of  $E_{p,a}$  vs. natural logarithm of scan rate ( $\ln v$ )
